# Supplementary material for: Incidence and mortality trend of congenital heart disease at the global, regional, and national level, 1990–2017
Source: PubMed Central journal article supplement — Medicine (Baltimore). 2020 Jun 5;99(23):e20593. doi: 10.1097/MD.0000000000020593 (PMC7306355; doi:10.1097/md.0000000000020593), 2020-06-05
Supplement: medi-99-e20593-s001.pdf [file medi-99-e20593-s001.pdf]

Supplemental material

Table S1. International Classification of Diseases version 10 (ICD-10) mapping to subcategories of congenital heart disease in the Global Burden of Disease 2017 database

| <b>ICD-10 code</b>                                                                                                | <b>ICD 10 name</b>                                      |
|-------------------------------------------------------------------------------------------------------------------|---------------------------------------------------------|
| <b>a) Single ventricle and single ventricle pathway defects</b>                                                   |                                                         |
| Q20.4                                                                                                             | Double inlet ventricle                                  |
| Q22.4                                                                                                             | Congenital tricuspid stenosis                           |
| Q22.6                                                                                                             | Hypoplastic right heart syndrome                        |
| Q23.4                                                                                                             | Hypoplastic left heart syndrome                         |
| <b>b) Severe congenital heart defects excluding single ventricle and single ventricle pathway defects</b>         |                                                         |
| Q20.0                                                                                                             | Common arterial trunk                                   |
| Q20.1                                                                                                             | Double outlet right ventricle                           |
| Q20.2                                                                                                             | Double outlet left ventricle                            |
| Q20.3                                                                                                             | Discordant ventriculoarterial connection                |
| Q21.3                                                                                                             | Tetralogy of Fallot                                     |
| Q22.0                                                                                                             | Pulmonary valve atresia                                 |
| Q23.0                                                                                                             | Congenital stenosis of aortic valve                     |
| Q23.1                                                                                                             | Congenital insufficiency of aortic valve                |
| Q26.2                                                                                                             | Total anomalous pulmonary venous connection             |
| <b>c) Critical malformations of great vessels, congenital valvular heart disease and patent ductus arteriosus</b> |                                                         |
| Q22.1                                                                                                             | Congenital pulmonary valve stenosis                     |
| Q22.2                                                                                                             | Congenital pulmonary valve insufficiency                |
| Q22.3                                                                                                             | Other congenital malformations of pulmonary valve       |
| Q22.5                                                                                                             | Ebstein's anomaly                                       |
| Q22.8                                                                                                             | Other congenital malformations of tricuspid valve       |
| Q22.9                                                                                                             | Congenital malformation of tricuspid valve, unspecified |
| Q23.2                                                                                                             | Congenital mitral stenosis                              |
| Q23.3                                                                                                             | Congenital mitral insufficiency                         |

|                                                                |                                                                          |
|----------------------------------------------------------------|--------------------------------------------------------------------------|
| Q23.8                                                          | Other congenital malformations of aortic and mitral valves               |
| Q23.9                                                          | Congenital malformation of aortic and mitral valves, unspecified         |
| Q25.0                                                          | Patent ductus arteriosus                                                 |
| Q25.1                                                          | Coarctation of aorta                                                     |
| Q25.2                                                          | Atresia of aorta                                                         |
| Q25.3                                                          | Supravalvular aortic stenosis                                            |
| Q25.4                                                          | Other congenital malformations of aorta                                  |
| Q25.5                                                          | Atresia of pulmonary artery                                              |
| <b>d) Ventricular septal defects and atrial septal defects</b> |                                                                          |
| Q21.0                                                          | Ventricular septal defect                                                |
| Q21.1                                                          | Atrial septal defect                                                     |
| Q21.2                                                          | Atrioventricular septal defect                                           |
| Q21.4                                                          | Aortopulmonary septal defect                                             |
| Q21.8                                                          | Other congenital malformations of cardiac septa                          |
| Q21.9                                                          | Congenital malformation of cardiac septum, unspecified                   |
| Q26.3                                                          | Partial anomalous pulmonary venous connection                            |
| <b>e) Other congenital cardiovascular anomalies</b>            |                                                                          |
| Q20.5                                                          | Discordant atrioventricular connection                                   |
| Q20.6                                                          | Isomerism of atrial appendages                                           |
| Q20.8                                                          | Other congenital malformations of cardiac chambers and connections       |
| Q20.9                                                          | Congenital malformation of cardiac chambers and connections, unspecified |
| Q24                                                            | Other congenital malformations of heart                                  |
| Q24.0                                                          | Dextrocardia                                                             |
| Q24.1                                                          | Levocardia                                                               |
| Q24.2                                                          | Cor triatriatum                                                          |
| Q24.3                                                          | Pulmonary infundibular stenosis                                          |
| Q24.4                                                          | Congenital subaortic stenosis                                            |
| Q24.5                                                          | Malformation of coronary vessels                                         |

---

|        |                                                              |
|--------|--------------------------------------------------------------|
| Q24.6  | Congenital heart block                                       |
| Q24.8  | Other specified congenital malformations of heart            |
| Q24.9  | Congenital malformation of heart, unspecified                |
| Q25.6  | Stenosis of pulmonary artery                                 |
| Q25.7  | Other congenital malformations of pulmonary artery           |
| Q25.71 | Coarctation of pulmonary artery                              |
| Q25.72 | Congenital pulmonary arteriovenous malformation              |
| Q25.79 | Other congenital malformations of pulmonary artery           |
| Q25.8  | Other congenital malformations of other great arteries       |
| Q25.9  | Congenital malformation of great arteries, unspecified       |
| Q26.0  | Congenital stenosis of vena cava                             |
| Q26.1  | Persistent left superior vena cava                           |
| Q26.4  | Anomalous pulmonary venous connection, unspecified           |
| Q26.5  | Anomalous portal venous connection                           |
| Q26.6  | Portal vein-hepatic artery fistula                           |
| Q26.8  | Other congenital malformations of great veins                |
| Q26.9  | Congenital malformation of great vein, unspecified           |
| Q27    | Other congenital malformations of peripheral vascular system |
| Q27.1  | Congenital renal artery stenosis                             |
| Q27.2  | Other congenital malformations of renal artery               |
| Q27.3  | Arteriovenous malformation (peripheral)                      |
| Q27.30 | Arteriovenous malformation, site unspecified                 |
| Q27.31 | Arteriovenous malformation of vessel of upper limb           |
| Q27.32 | Arteriovenous malformation of vessel of lower limb           |
| Q27.33 | Arteriovenous malformation of digestive system vessel        |
| Q27.34 | Arteriovenous malformation of renal vessel                   |
| Q27.39 | Arteriovenous malformation, other site                       |

---

---

|       |                                                                        |
|-------|------------------------------------------------------------------------|
| Q27.4 | Congenital phlebectasia                                                |
| Q27.8 | Other specified congenital malformations of peripheral vascular system |
| Q27.9 | Congenital malformation of peripheral vascular system, unspecified     |
| Q28   | Other congenital malformations of circulatory system                   |
| Q28.0 | Arteriovenous malformation of precerebral vessels                      |
| Q28.1 | Other malformations of precerebral vessels                             |
| Q28.2 | Arteriovenous malformation of cerebral vessels                         |
| Q28.3 | Other malformations of cerebral vessels                                |
| Q28.8 | Other specified congenital malformations of circulatory system         |
| Q28.9 | Congenital malformation of circulatory system, unspecified             |

---

ICD-10: International Classification of Diseases version 10

References in supplement

1. Zimmerman MS, Smith AGC, Sable CA, et al. Global, regional, and national burden of congenital heart disease, 1990–2017: a systematic analysis for the Global Burden of Disease Study 2017. *The Lancet Child & Adolescent Health*. 2020;4(3):185-200.
